# Supplementary material
Source: PubMed Central journal article supplement (PMC117332)

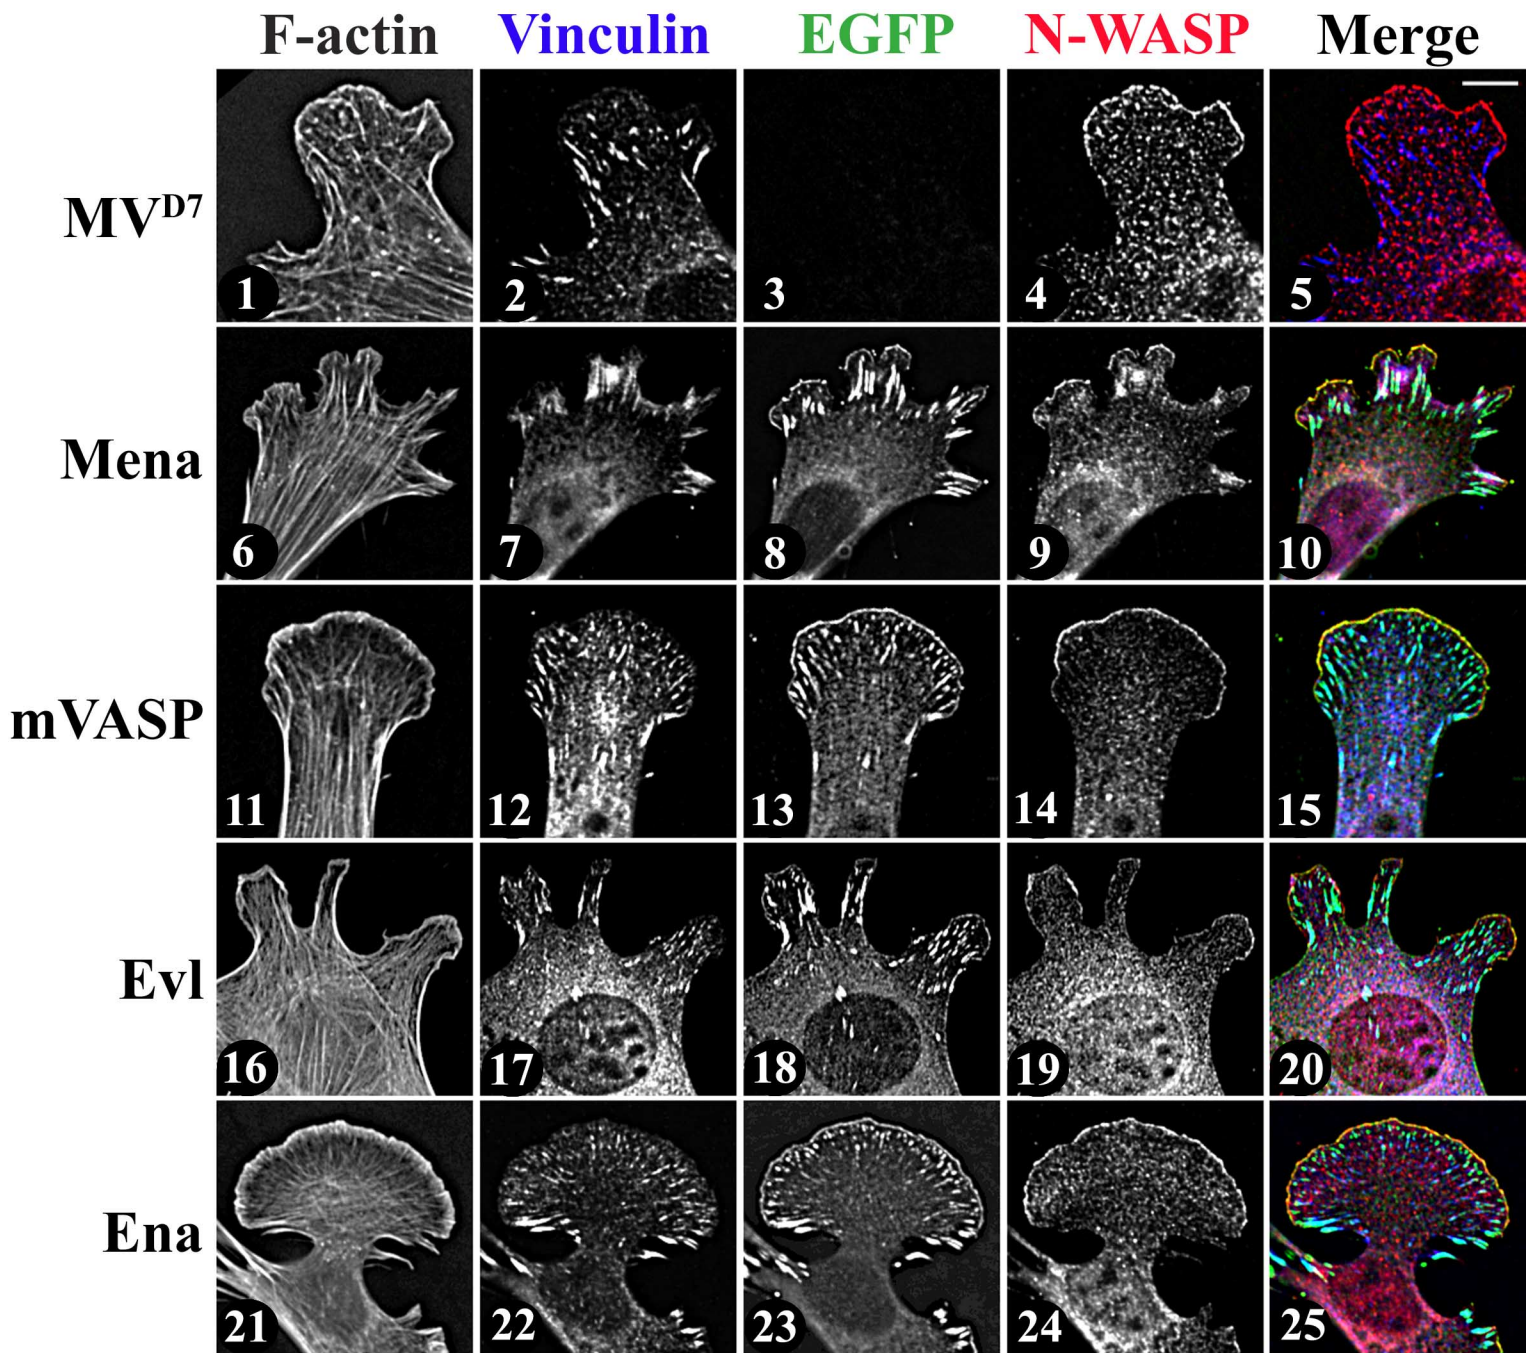

Loureiro et al., Sup Fig S1

Supplement: mbc_13_7_2533__1.pdf [file mbc_13_7_2533__1.pdf]
